# Supplementary material for: Papillomavirus Genomes Associate with BRD4 to Replicate at Fragile Sites in the Host Genome
Source: PLoS Pathog. 2014 May 15;10(5):e1004117. doi: 10.1371/journal.ppat.1004117 (PMC4022725; doi:10.1371/journal.ppat.1004117)
Supplement: Table S5 — List of BRD4, FancD2, 16E1 binding sites used for analysis in Figure S7. (XLSX) [file ppat.1004117.s014.xlsx]

## Sheet: 22856-C33A-HPV1E2-BRD4
22856-C33A-HPV1E2-anti-Brd4-500-0.5-5000-10-chers.bed-1e+05-combined
Chromosome	Start	End	Size
chr1	760809	874599	113790
chr1	8739657	8877025	137368
chr1	23854169	24120219	266050
chr1	31425309	31538399	113090
chr1	61516904	61927554	410650
chr1	64312786	64676658	363872
chr1	68147974	68261104	113130
chr1	68577174	68908128	330954
chr1	74663149	75156633	493484
chr1	81703314	82020411	317097
chr1	82944348	83072168	127820
chr1	83272932	83449528	176596
chr1	87987762	88527016	539254
chr1	90273826	90453786	179960
chr1	149762057	150041051	278994
chr1	161087486	161197400	109914
chr1	161420360	161593322	172962
chr1	162822390	163172522	350132
chr1	172114849	172369541	254692
chr1	185280516	185704797	424281
chr1	185821995	185943853	121858
chr1	198359273	198734805	375532
chr1	199402597	199521361	118764
chr1	199627455	199803371	175916
chr1	199996551	200145175	148624
chr1	205297365	205400399	103034
chr1	225612785	225837814	225029
chr1	246173899	246326546	152647
chr10	10750778	11197906	447128
chr10	21786374	22031847	245473
chr10	28406999	28530962	123963
chr10	36177828	36972488	794660
chr10	69111577	69283278	171701
chr10	73819168	74034414	215246
chr10	76581712	76781752	200040
chr10	89573654	89727572	153918
chr10	92630606	92801138	170532
chr10	102669630	102822228	152598
chr10	110308815	110531100	222285
chr11	57406400	57532084	125684
chr11	62338803	62623436	284633
chr11	63952662	64085678	133016
chr11	65183092	65339522	156430
chr11	66313296	66494796	181500
chr11	90639397	90998532	359135
chr11	102216680	102322872	106192
chr11	111316448	111475244	158796
chr11	114819446	115376540	557094
chr11	128835548	129250177	414629
chr12	6959937	7073683	113746
chr12	12712059	12940803	228744
chr12	13246543	13882793	636250
chr12	14518263	14656487	138224
chr12	15471349	15658845	187496
chr12	23488471	24382275	893804
chr12	24624353	24750767	126414
chr12	42851457	43862407	1010950
chr12	46660761	47055025	394264
chr12	57853145	58004877	151732
chr12	66220079	66360781	140702
chr12	68615153	68877456	262303
chr12	89741828	89847567	105739
chr13	22977016	23425095	448079
chr13	32738110	32872184	134074
chr13	37439010	37570632	131622
chr13	39916856	40178106	261250
chr13	41555260	41707724	152464
chr13	66878667	67812332	933665
chr13	68713093	68984093	271000
chr13	69088449	69504065	415616
chr13	74418345	74860837	442492
chr13	81049317	81229783	180466
chr13	89992329	90662477	670148
chr13	90849022	91513363	664341
chr13	109777039	109897677	120638
chr13	113348835	113488429	139594
chr14	23397680	23541558	143878
chr14	33041251	34112879	1071628
chr14	36581081	36742597	161516
chr14	63070339	63737701	667362
chr14	68437387	69076191	638804
chr15	35917723	36152223	234500
chr15	36648314	36790065	141751
chr15	87162042	87462680	300638
chr16	72534219	72699944	165725
chr16	73572157	73748894	176737
chr17	45662939	45772911	109972
chr17	57642168	57760756	118588
chr17	58821354	59367608	546254
chr18	3446927	3656164	209237
chr18	50028558	50919342	890784
chr18	60384256	60545844	161588
chr18	63472854	63820285	347431
chr18	67286361	67514632	228271
chr19	42364508	42790038	425530
chr19	47612774	47733898	121124
chr2	20100259	20251781	151522
chr2	27994174	28114651	120477
chr2	48873168	49018338	145170
chr2	57935584	58130235	194651
chr2	64876566	64997228	120662
chr2	79485852	80244509	758657
chr2	153193002	153576780	383778
chr2	160469510	160570649	101139
chr2	163434367	163695888	261521
chr2	172820440	172968678	148238
chr2	173839888	174084112	244224
chr2	177188486	177320580	132094
chr2	189155013	190335365	1180352
chr2	196396763	196525330	128567
chr2	197789027	198078352	289325
chr2	210213129	210339627	126498
chr2	212258587	212408475	149888
chr2	212607899	213189374	581475
chr2	213312273	213461447	149174
chr2	213930955	214240271	309316
chr2	223037860	223170562	132702
chr2	224144388	224563472	419084
chr2	226753907	227667423	913516
chr20	11190518	11327922	137404
chr20	14733734	14931498	197764
chr20	52105315	52214636	109321
chr21	17360943	18503685	1142742
chr21	34914212	35058824	144612
chr3	29104983	29979007	874024
chr3	30239478	30519852	280374
chr3	48964736	49066424	101688
chr3	71214900	71449072	234172
chr3	71623871	71836858	212987
chr3	81717958	82250214	532256
chr3	84919678	86296551	1376873
chr3	114340955	114598894	257939
chr3	115106782	115233344	126562
chr3	115342150	115531558	189408
chr3	161201921	161304784	102863
chr3	161582401	161929860	347459
chr3	180927170	181486824	559654
chr3	181617326	181979581	362255
chr3	191604946	192006712	401766
chr4	18690793	19313368	622575
chr4	19415168	19544632	129464
chr4	19658976	19814908	155932
chr4	20249794	20575098	325304
chr4	34373539	35085481	711942
chr4	38904431	39065827	161396
chr4	90506429	90993361	486932
chr4	91428425	92009619	581194
chr4	104916907	105163721	246814
chr4	105314006	105782673	468667
chr4	119901244	120135560	234316
chr4	124225418	125043485	818067
chr4	145210786	145609236	398450
chr4	145962116	146100780	138664
chr4	151155016	151775184	620168
chr4	158924424	159079677	155253
chr4	160018119	160365638	347519
chr4	177638266	177826432	188166
chr4	177927659	178245548	317889
chr4	183056830	183501996	445166
chr5	9284732	9452815	168083
chr5	19779117	20305229	526112
chr5	20420574	20578105	157531
chr5	44263887	44393694	129807
chr5	50673719	51305215	631496
chr5	58181327	58654603	473276
chr5	73193181	73945987	752806
chr5	91222128	91380482	158354
chr5	91600096	92769558	1169462
chr5	92903220	93266094	362874
chr5	93856530	94273330	416800
chr5	102861237	103497407	636170
chr5	106906461	107010130	103669
chr5	123908977	125679435	1770458
chr5	166998884	167449110	450226
chr6	19668517	19862283	193766
chr6	21588921	22150144	561223
chr6	25418657	25603901	185244
chr6	26030491	26332667	302176
chr6	30579569	30712183	132614
chr6	31513401	31704297	190896
chr6	33168596	33398622	230026
chr6	53660727	54337229	676502
chr6	54450040	54931596	481556
chr6	56911609	57039195	127586
chr6	72087163	72217061	129898
chr6	90651162	91191449	540287
chr6	105387019	105627429	240410
chr6	108685091	108995517	310426
chr6	121755720	122611287	855567
chr6	132381312	132558999	177687
chr6	134636228	135032995	396767
chr6	139688621	141886451	2197830
chr6	142467227	142788620	321393
chr6	150943705	151089847	146142
chr6	152782723	153023818	241095
chr7	12677722	13059178	381456
chr7	20072673	20370729	298056
chr7	20522009	20639702	117693
chr7	79841870	80291878	450008
chr7	80510767	80838138	327371
chr7	83033472	83894564	861092
chr7	84626232	85570133	943901
chr7	93631576	94068758	437182
chr7	100484840	100646086	161246
chr7	130523661	130696853	173192
chr7	135751862	135865702	113840
chr8	31983226	32166038	182812
chr8	32402872	32610326	207454
chr8	59633996	60036466	402470
chr8	74401000	74536702	135702
chr8	77437479	77714726	277247
chr8	82695346	83330757	635411
chr8	83452975	83658627	205652
chr8	105808104	106156944	348840
chr8	128189422	128320221	130799
chr8	128746342	128918494	172152
chr9	13266031	13431854	165823
chr9	14195600	14354732	159132
chr9	16482568	16870206	387638
chr9	21591110	21785562	194452
chrX	10427828	10590096	162268
chrX	41373288	41620764	247476
chrX	45608046	45774196	166150
chrX	83410451	83581172	170721
chrX	132305860	132810860	505000
chrX	132923384	133119534	196150

## Sheet: 31388_FANCD2
31388_FANCD2-500-0.5-5000-10-chers.bed.combine.100kb.remove
Chromosome	Start	End	Size
chr1	1168843	1337667	168824
chr1	2115822	2338340	222518
chr1	3067606	3212868	145262
chr1	6160765	6308719	147954
chr1	8703907	8877025	173118
chr1	31403157	31538399	135242
chr1	54822422	54955144	132722
chr1	68577174	68964702	387528
chr1	71986434	72880160	893726
chr1	76751823	76938885	187062
chr1	149783348	150041051	257703
chr1	154928806	155205712	276906
chr1	156563626	156720620	156994
chr1	193053461	193204325	150864
chr1	199627455	199774823	147368
chr1	217711691	217931226	219535
chr1	243506906	243737876	230970
chr1	245661766	246378239	716473
chr10	10887555	11385600	498045
chr10	20934780	21073466	138686
chr10	21194997	21390843	195846
chr10	21786581	22033943	247362
chr10	36398454	36623620	225166
chr10	36780713	36972488	191775
chr10	57308532	57847063	538531
chr10	64919794	65029104	109310
chr10	68293538	68697436	403898
chr10	73883752	74096664	212912
chr10	78857063	79219518	362455
chr10	102669630	102822478	152848
chr10	109556458	109846579	290121
chr10	109952954	110148646	195692
chr10	114573306	114888306	315000
chr10	117223783	117562989	339206
chr11	16365061	16636286	271225
chr11	28030908	28319904	288996
chr11	28421374	28839630	418256
chr11	31046946	31534968	488022
chr11	61567258	61682746	115488
chr11	62338803	62623436	284633
chr11	63973454	64085678	112224
chr11	65111262	65342562	231300
chr11	71714736	71815297	100561
chr11	83518413	83843473	325060
chr11	84475486	85071544	596058
chr11	87077081	87462890	385809
chr11	102216680	102324646	107966
chr11	108933058	109037225	104167
chr11	118309096	118477542	168446
chr11	118790078	118973122	183044
chr11	128990784	129192434	201650
chr12	9462797	9601444	138647
chr12	11213500	11586055	372555
chr12	23680013	24394983	714970
chr12	42851457	43181749	330292
chr12	43297799	43522777	224978
chr12	46660761	46768457	107696
chr12	49411733	49584181	172448
chr12	54380067	54612395	232328
chr12	57855051	58019635	164584
chr12	66991824	67146674	154850
chr12	68615978	68850396	234418
chr12	83225037	83437611	212574
chr12	99135898	99549037	413139
chr12	99836597	100378021	541424
chr12	102772728	103166046	393318
chr12	133177745	133403395	225650
chr13	19120944	19242114	121170
chr13	35773089	36050524	277435
chr13	41052336	41179908	127572
chr13	64537305	64900852	363547
chr13	91417378	91698044	280666
chr13	96873825	97299049	425224
chr13	107862338	108273849	411511
chr13	113348835	113497625	148790
chr14	19931824	20074048	142224
chr14	23397680	23541558	143878
chr14	32937309	33231473	294164
chr14	33697462	34040997	343535
chr14	37403715	38380853	977138
chr14	40132086	40753247	621161
chr14	41048035	41650684	602649
chr14	45598233	45848024	249791
chr14	66825525	67035839	210314
chr14	67312416	67474443	162027
chr14	68437387	69075597	638210
chr14	80816996	81133383	316387
chr14	106108341	106237021	128680
chr15	35473430	35930272	456842
chr15	60879448	61293232	413784
chr15	71643189	71951204	308015
chr15	84863988	84964192	100204
chr16	2610183	2817907	207724
chr16	3072079	3240043	167964
chr16	12296079	12462485	166406
chr16	16326329	16456641	130312
chr16	18441353	18573662	132309
chr16	47428126	47531737	103611
chr16	72459501	72867369	407868
chr16	78213388	79105271	891883
chr16	89638339	89763239	124900
chr17	13885251	14035275	150024
chr17	17595214	17725431	130217
chr17	18006229	18227913	221684
chr17	59080720	59240144	159424
chr17	59393988	59547274	153286
chr17	73388362	73496253	107891
chr17	79374207	79479151	104944
chr17	80040325	80204743	164418
chr18	15024668	15151395	126727
chr18	34160402	34531074	370672
chr18	36822498	37186068	363570
chr18	39685702	39892186	206484
chr18	54264392	54539090	274698
chr18	60384256	60545844	161588
chr18	64237722	64541439	303717
chr18	77138082	77250168	112086
chr19	1842712	1944672	101960
chr19	2099982	2233832	133850
chr19	11029634	11139760	110126
chr19	13049438	13249196	199758
chr19	15356898	15515270	158372
chr19	50083064	50193698	110634
chr19	55758262	55897896	139634
chr19	58964940	59071960	107020
chr2	3294409	3487759	193350
chr2	14889399	15007659	118260
chr2	15124047	15448235	324188
chr2	18898905	19878433	979528
chr2	20100259	20251781	151522
chr2	23856693	23979234	122541
chr2	45869640	46135782	266142
chr2	57770230	58276334	506104
chr2	64863156	64997228	134072
chr2	79737549	80738106	1000557
chr2	114256205	114386538	130333
chr2	132276066	132393414	117348
chr2	132613902	132753737	139835
chr2	138761854	139132117	370263
chr2	148602282	148925874	323592
chr2	153192678	153573754	381076
chr2	158889338	159049332	159994
chr2	160468535	160629514	160979
chr2	187229779	187400017	170238
chr2	189847341	190152697	305356
chr2	194399297	194813575	414278
chr2	205713881	206258067	544186
chr2	212242401	213189374	946973
chr2	213312273	213465493	153220
chr2	236647957	237149737	501780
chr2	242143691	242257579	113888
chr20	12035288	12249414	214126
chr20	13025516	13281346	255830
chr20	61408765	61557287	148522
chr20	62579912	62868264	288352
chr21	14547447	14678374	130927
chr21	17441333	18057717	616384
chr21	28918989	29496103	577114
chr22	21696044	21870784	174740
chr22	28377918	28840011	462093
chr22	50852432	50963466	111034
chr3	3770717	4335470	564753
chr3	4451164	4625576	174412
chr3	8308718	8413120	104402
chr3	17196172	17396642	200470
chr3	28545877	28770157	224280
chr3	48633382	48755110	121728
chr3	49049396	49170536	121140
chr3	55666758	56165222	498464
chr3	59924876	60448606	523730
chr3	60615545	60935034	319489
chr3	61790406	62114586	324180
chr3	65463221	65652750	189529
chr3	67283363	67668112	384749
chr3	71184874	71508224	323350
chr3	78751076	78962259	211183
chr3	81909815	82214702	304887
chr3	85243986	86017826	773840
chr3	114283714	114820202	536488
chr3	143821888	144113158	291270
chr3	158148238	158251940	103702
chr3	180984190	181486824	502634
chr3	188182524	188697866	515342
chr3	192107639	192290656	183017
chr3	196661254	196762719	101465
chr4	12724749	13370292	645543
chr4	20249794	20703124	453330
chr4	33490465	34119467	629002
chr4	40814043	41017909	203866
chr4	66927055	67035497	108442
chr4	87073306	87281588	208282
chr4	90667321	90816712	149391
chr4	91763449	92208658	445209
chr4	93515845	94494797	978952
chr4	105314853	105416840	101987
chr4	113738897	114290613	551716
chr4	115312447	115560747	248300
chr4	124316154	124860452	544298
chr4	151173140	151602553	429413
chr4	160026226	160268270	242044
chr4	183056830	183840690	783860
chr5	12580359	12839976	259617
chr5	19660509	20305049	644540
chr5	58181989	58482497	300508
chr5	65112832	65225058	112226
chr5	91821670	92538217	716547
chr5	92736694	93334672	597978
chr5	93717765	94270206	552441
chr5	102882391	103329635	447244
chr5	106907027	107009697	102670
chr5	115694119	115815103	120984
chr5	123963955	124913359	949404
chr5	134345937	134463899	117962
chr6	1765474	2197597	432123
chr6	5108715	5730325	621610
chr6	19718642	19843448	124806
chr6	21740405	22151820	411415
chr6	23633977	23885289	251312
chr6	24170587	24355735	185148
chr6	26030491	26332667	302176
chr6	28556533	28779727	223194
chr6	31587867	31996270	408403
chr6	33172042	33387246	215204
chr6	38119094	38315066	195972
chr6	53853213	54136487	283274
chr6	56911609	57039642	128033
chr6	83495219	83762153	266934
chr6	101197431	101626851	429420
chr6	104620463	104975775	355312
chr6	105389997	105528215	138218
chr6	122088103	122395699	307596
chr6	126325457	126985581	660124
chr6	139689741	139797209	107468
chr6	141585102	141886451	301349
chr6	142621987	142788620	166633
chr6	148188240	148518377	330137
chr6	161814048	162865700	1051652
chr6	163017072	163328680	311608
chr7	3681069	4058426	377357
chr7	12677722	13059178	381456
chr7	13198521	13572527	374006
chr7	27136835	27238411	101576
chr7	40339701	40941326	601625
chr7	69416223	70229770	813547
chr7	84626232	84932285	306053
chr7	109419268	109528777	109509
chr7	109636308	110883394	1247086
chr7	133332830	133696012	363182
chr7	150753987	150894429	140442
chr7	157865305	158333121	467816
chr8	32406934	32509099	102165
chr8	48510577	48649823	139246
chr8	59634202	60036466	402264
chr8	90616436	90872316	255880
chr8	100450332	100649626	199294
chr8	104664531	104944396	279865
chr8	110003966	110147524	143558
chr8	140849011	141360886	511875
chr9	12338	118402	106064
chr9	16312848	16869992	557144
chr9	32134282	32349723	215441
chr9	35662872	35814436	151564
chr9	81180164	81746875	566711
chr9	85986756	86180426	193670
chr9	103003548	103114733	111185
chr9	108730060	109088639	358579
chr9	140427335	140562259	134924
chr9	140709003	140869141	160138
chrX	6665603	6770408	104805
chrX	6928630	7078395	149765
chrX	7182162	7442010	259848
chrX	7864470	8275194	410724
chrX	10709207	10929641	220434
chrX	19663421	19830197	166776
chrX	27096679	27303897	207218
chrX	35970291	36328658	358367
chrX	40996178	41208814	212636
chrX	91329462	91685532	356070
chrX	96190606	96725918	535312
chrX	128005175	128170285	165110
chrX	132440054	132547864	107810

## Sheet: 31388_HPV16E1
31388_HPV16E1-500-0.5-5000-15-chers.bed.combine.100kb.remove
Chromosome	Start	End	Size
chr1	8431030	8877405	446375
chr1	61517098	61928216	411118
chr1	68147974	68261838	113864
chr1	68579962	68684776	104814
chr1	68795592	68964702	169110
chr1	90273826	90476830	203004
chr1	103573360	103685604	112244
chr1	142518452	142651610	133158
chr1	149810940	150208874	397934
chr1	154129230	154239014	109784
chr1	193053461	193156781	103320
chr1	197069131	197170767	101636
chr1	199627455	199779531	152076
chr1	199996551	200145175	148624
chr1	214617659	214833005	215346
chr1	225611531	225726495	114964
chr1	243286975	243421451	134476
chr10	11045133	11380618	335485
chr10	21177090	21322004	144914
chr10	21976410	22098090	121680
chr10	22517652	22633818	116166
chr10	35636260	35793020	156760
chr10	36710884	36908172	197288
chr10	63655852	63758102	102250
chr10	64926117	65029104	102987
chr10	70359204	70516660	157456
chr10	89572782	89698546	125764
chr11	12696924	12898458	201534
chr11	45990980	46122772	131792
chr11	47490098	47595306	105208
chr11	65119000	65273673	154673
chr11	71713086	71815297	102211
chr11	102216680	102323036	106356
chr11	109999082	110102850	103768
chr11	115046947	115293597	246650
chr11	128960363	129250177	289814
chr12	6644151	6784707	140556
chr12	13524645	13820006	295361
chr12	15406533	15519967	113434
chr12	23680013	24263049	583036
chr12	24635013	24750767	115754
chr12	43128165	43500733	372568
chr12	43604329	43798485	194156
chr12	46752475	47055025	302550
chr12	56520329	56648445	128116
chr12	66220079	66360781	140702
chr12	68615153	68728087	112934
chr12	69052275	69238129	185854
chr12	116503991	116714405	210414
chr13	37463106	37598713	135607
chr13	39943186	40176756	233570
chr13	41578620	41768546	189926
chr13	45004912	45150250	145338
chr13	67673593	67804353	130760
chr13	97872973	98085559	212586
chr14	20823340	20929188	105848
chr14	33041251	34040997	999746
chr14	54940936	55119462	178526
chr14	57732921	57862181	129260
chr14	61026378	61188073	161695
chr14	63070719	63213271	142552
chr14	63351820	63511629	159809
chr14	68577993	68939911	361918
chr15	38545378	38646765	101387
chr15	56384838	56535348	150510
chr15	57212052	57511410	299358
chr15	68479703	68583942	104239
chr16	29446962	29552746	105784
chr16	72401832	72506601	104769
chr17	26908781	27076381	167600
chr17	29528074	29648764	120690
chr17	30701993	30809659	107666
chr17	35466038	35567275	101237
chr17	46986885	47133661	146776
chr17	56048731	56169745	121014
chr17	58909308	59240144	330836
chr17	79374023	79479355	105332
chr18	18837473	18950014	112541
chr18	60384472	60643598	259126
chr2	9989095	10095961	106866
chr2	36584386	36783214	198828
chr2	54684596	54954698	270102
chr2	64684988	64997228	312240
chr2	71503322	71652272	148950
chr2	74650460	74760758	110298
chr2	79864904	80155823	290919
chr2	86332262	86441097	108835
chr2	128473442	128621860	148418
chr2	153193002	153573754	380752
chr2	160371595	160624041	252446
chr2	161182076	161349240	167164
chr2	163433983	163698345	264362
chr2	174938512	175045604	107092
chr2	189828173	190044147	215974
chr2	191795567	191898433	102866
chr2	197789027	198061884	272857
chr2	210242905	210560863	317958
chr2	212240949	213186471	945522
chr2	213319443	213461447	142004
chr2	213930955	214118691	187736
chr2	226894716	227079141	184425
chr2	227233772	227358658	124886
chr2	242166603	242294479	127876
chr20	43536606	43646797	110191
chr20	61429339	61535391	106052
chr21	17369989	17979275	609286
chr21	27421286	27541729	120443
chr21	38740702	38889664	148962
chr22	36140186	36262138	121952
chr22	38709056	38888072	179016
chr3	31577694	31679818	102124
chr3	71623468	71754046	130578
chr3	81809707	82280517	470810
chr3	84992190	86037980	1045790
chr3	142740902	142844664	103762
chr3	150121270	150263686	142416
chr3	151977537	152167208	189671
chr3	159491204	159593571	102367
chr3	180930110	181472571	542461
chr3	181797737	181979581	181844
chr4	20249794	20703124	453330
chr4	26863370	26967494	104124
chr4	34964863	35071423	106560
chr4	57796083	57901191	105108
chr4	77437002	77631875	194873
chr4	90637788	90860139	222351
chr4	105314006	105517086	203080
chr4	124466938	124861622	394684
chr4	151200875	151775184	574309
chr4	153268563	153372107	103544
chr4	160026226	160282826	256600
chr4	177588948	177816560	227612
chr4	183056830	183536914	480084
chr4	184065452	184179571	114119
chr5	14166734	14287588	120854
chr5	19649029	19816674	167645
chr5	19936027	20119885	183858
chr5	20244143	20578105	333962
chr5	36875899	36986851	110952
chr5	50669465	50863356	193891
chr5	58181327	58573840	392513
chr5	64629488	64777734	148246
chr5	91635118	91742115	106997
chr5	91884380	92591505	707125
chr5	92741752	93278141	536389
chr5	94023934	94273330	249396
chr5	102860791	103255085	394294
chr5	106868179	107010130	141951
chr5	123908977	124110303	201326
chr5	124221968	124921021	699053
chr5	125031613	125174413	142800
chr5	137084227	137224919	140692
chr5	166992592	167159785	167193
chr6	19718642	19866383	147741
chr6	21588921	22153671	564750
chr6	24222559	24355735	133176
chr6	26016461	26313871	297410
chr6	31587867	31798079	210212
chr6	33165954	33386462	220508
chr6	53922761	54220889	298128
chr6	54588289	54787767	199478
chr6	56911415	57055078	143663
chr6	90789061	91099929	310868
chr6	105389295	105629337	240042
chr6	107811839	107949804	137965
chr6	108742541	109007417	264876
chr6	121947893	122475484	527591
chr6	139688621	139797209	108588
chr6	139909153	140402263	493110
chr6	141557837	141886451	328614
chr6	142519472	142788620	269148
chr6	152782723	153023818	241095
chr6	157092622	157359556	266934
chr6	163837058	163998516	161458
chr7	12660628	13034583	373955
chr7	13197501	13324978	127477
chr7	18399973	18599317	199344
chr7	80429974	80552522	122548
chr7	83669622	83819262	149640
chr7	84626232	84956426	330194
chr7	85108928	85520810	411882
chr7	104623174	104758568	135394
chr7	130578624	130682230	103606
chr8	32454618	32612801	158183
chr8	59702580	60036466	333886
chr8	77437243	77757276	320033
chr8	80852628	80993481	140853
chr8	83073541	83302683	229142
chr8	128929820	129090663	160843
chr9	14084776	14345772	260996
chr9	16410182	16870206	460024
chr9	20473616	20622146	148530
chr9	37137399	37442482	305083
chr9	127355768	127532195	176427
chr9	128512097	128678650	166553
chrX	9508264	9617420	109156
chrX	41373288	41527438	154150
chrX	91025918	91128918	103000
chrX	132433874	132746128	312254
chrX	132922641	133118754	196113
